# Supplementary material
Source: Research Square preprint supplement (doi:10.21203/rs.3.rs-9408192/v1)

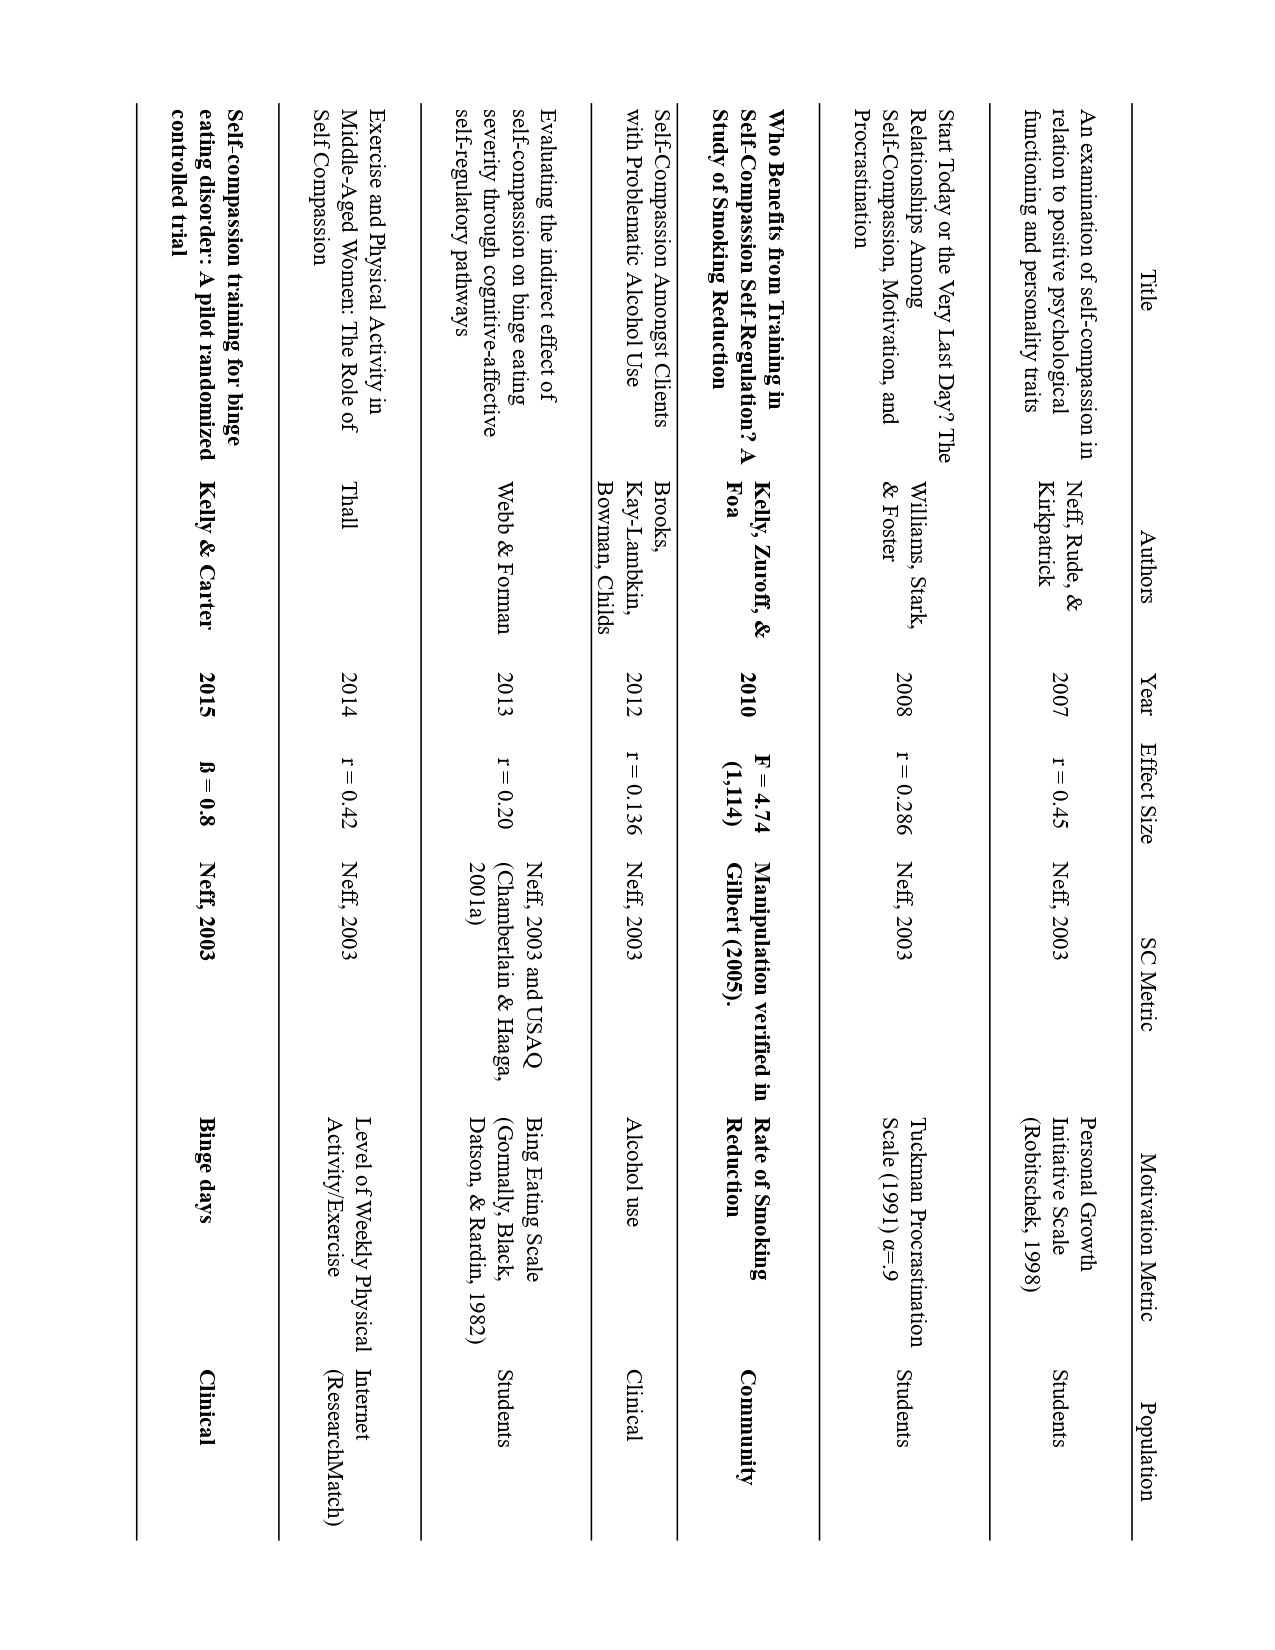


**
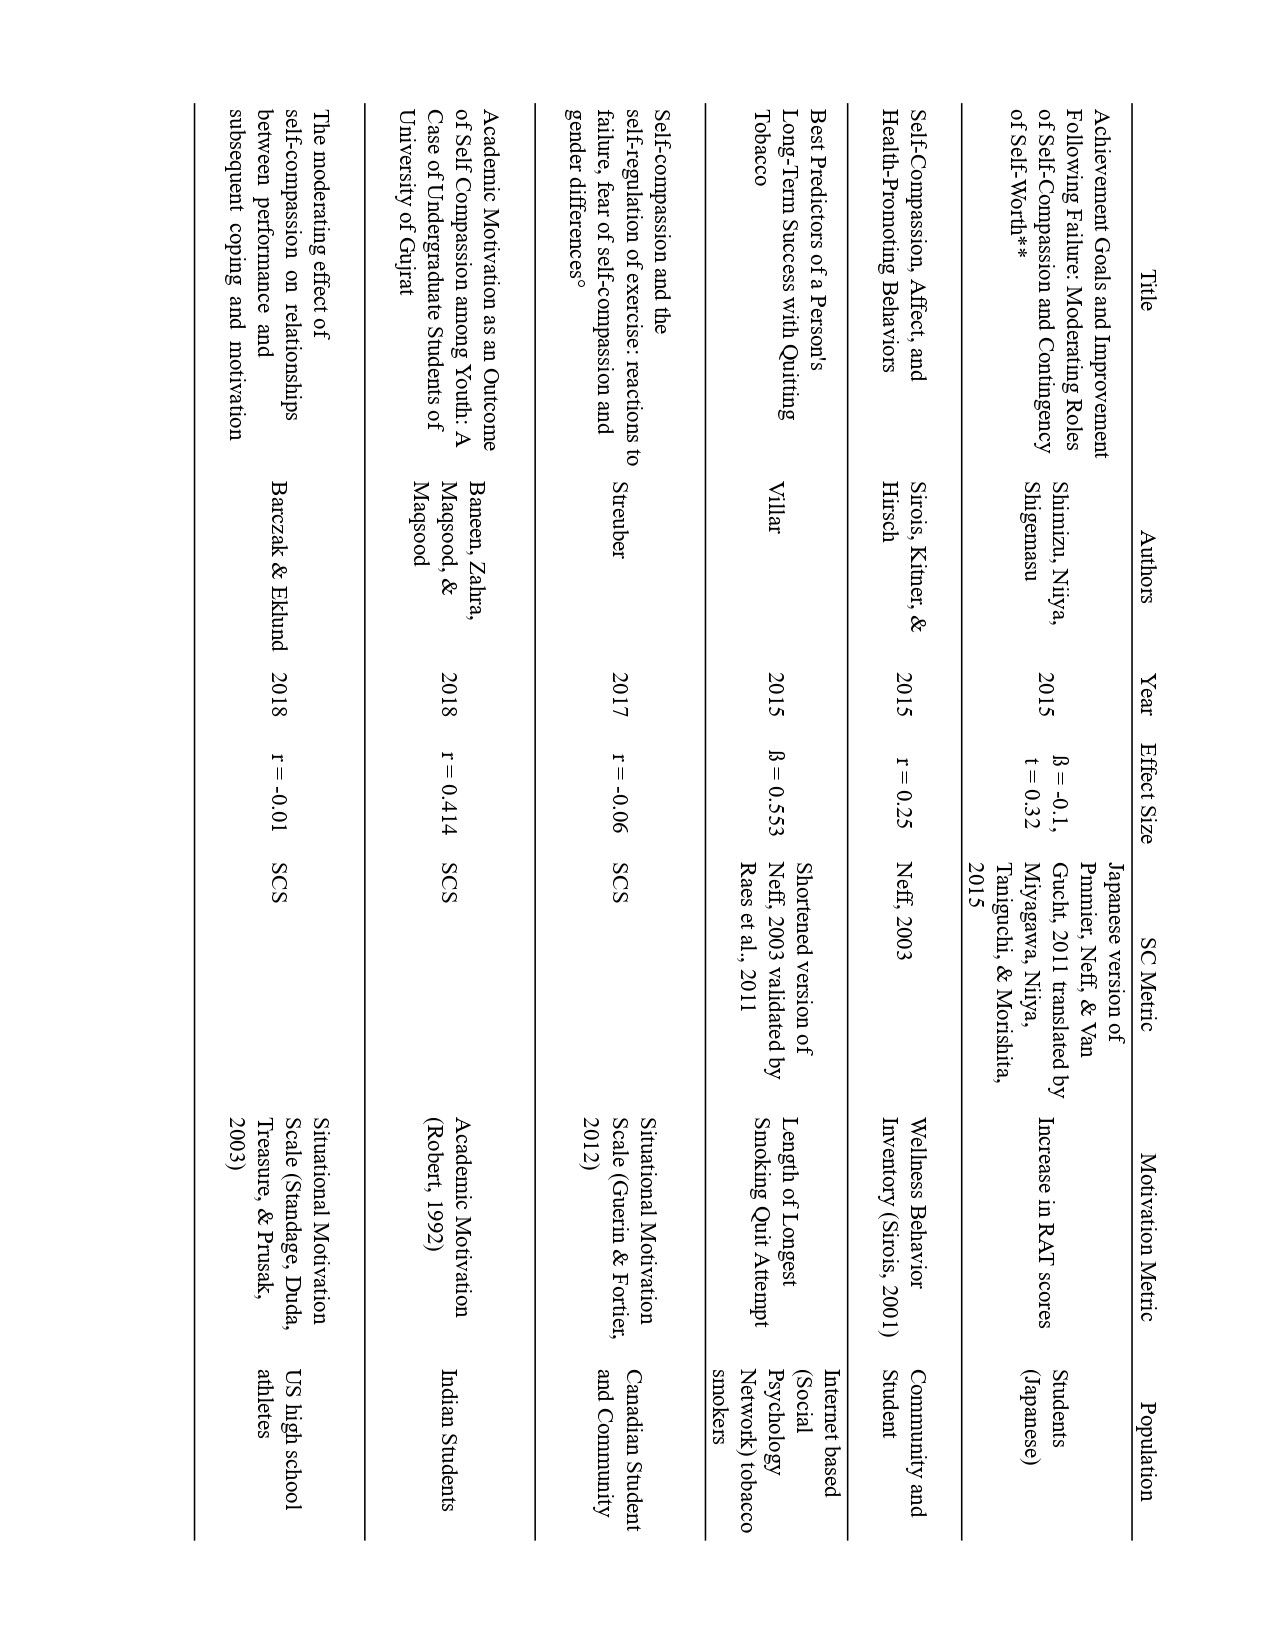
**

**
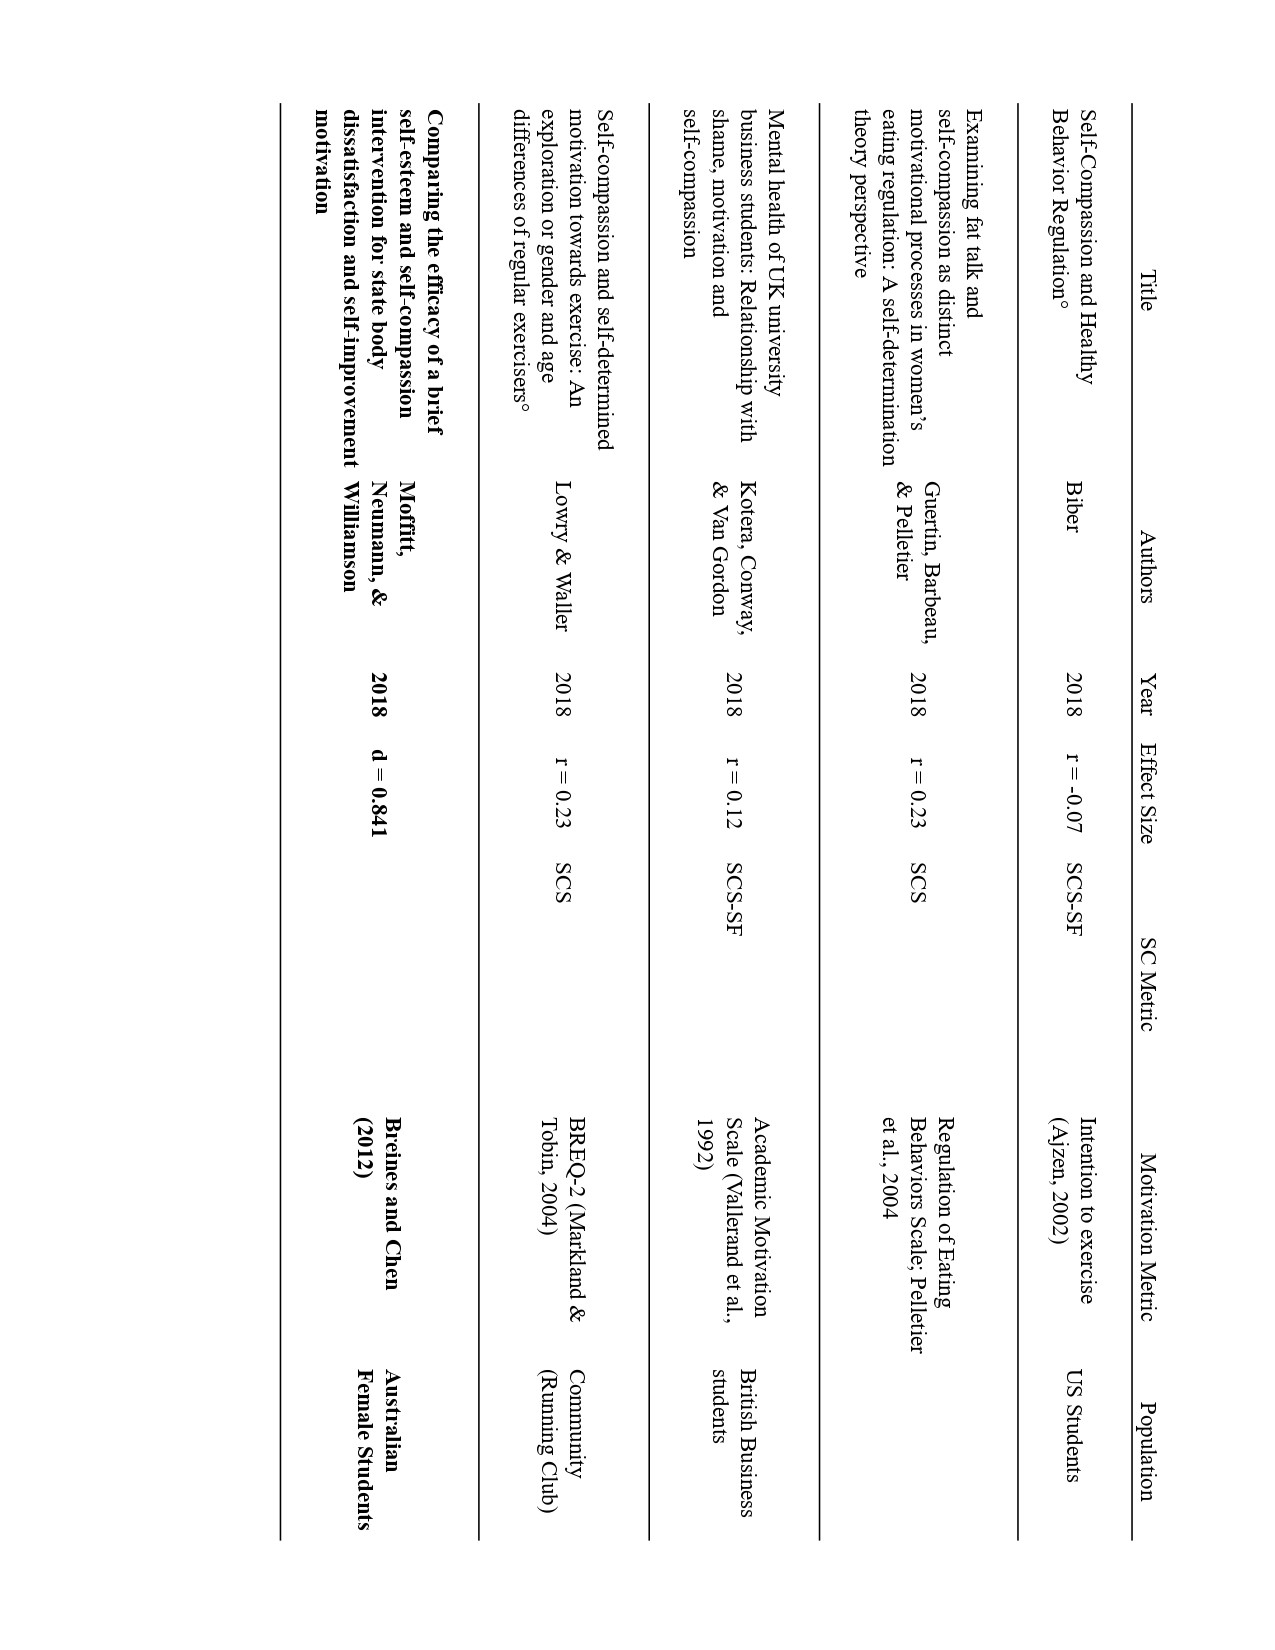
**

**
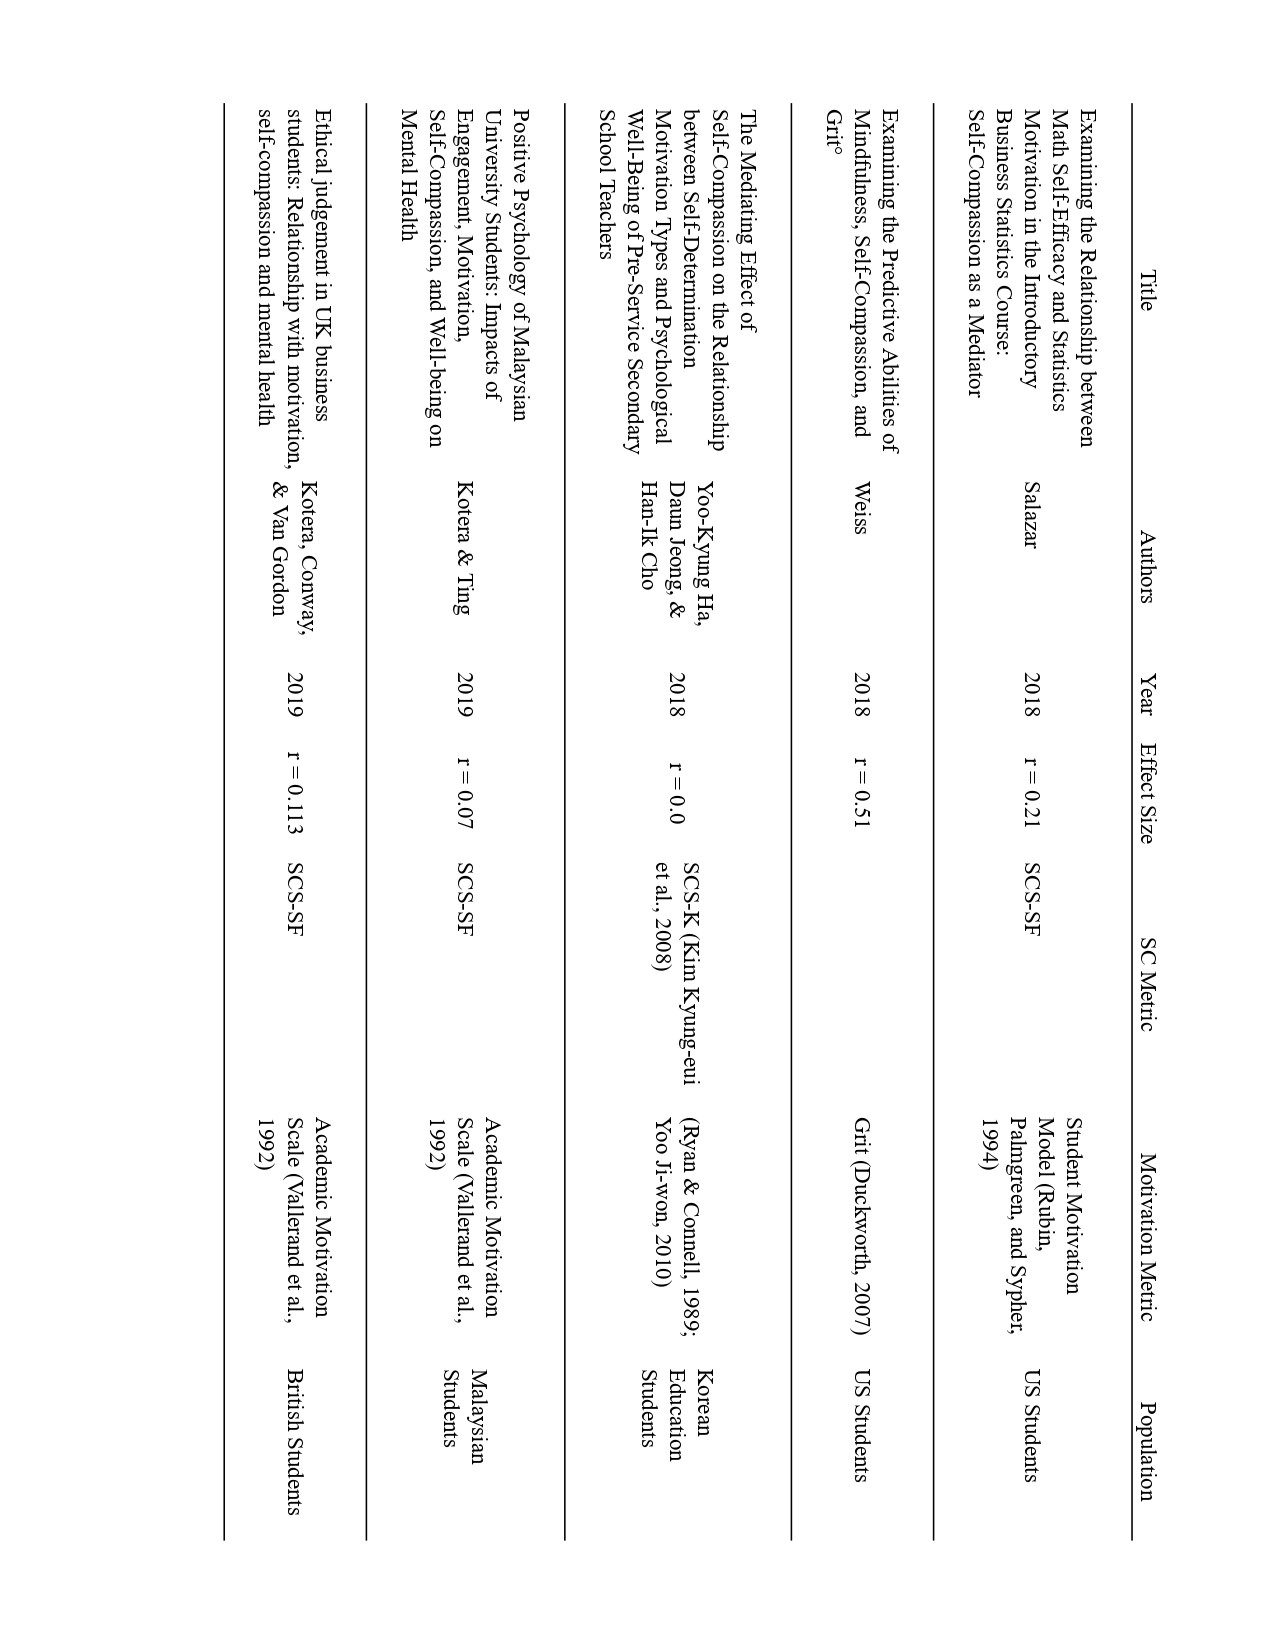
**

**
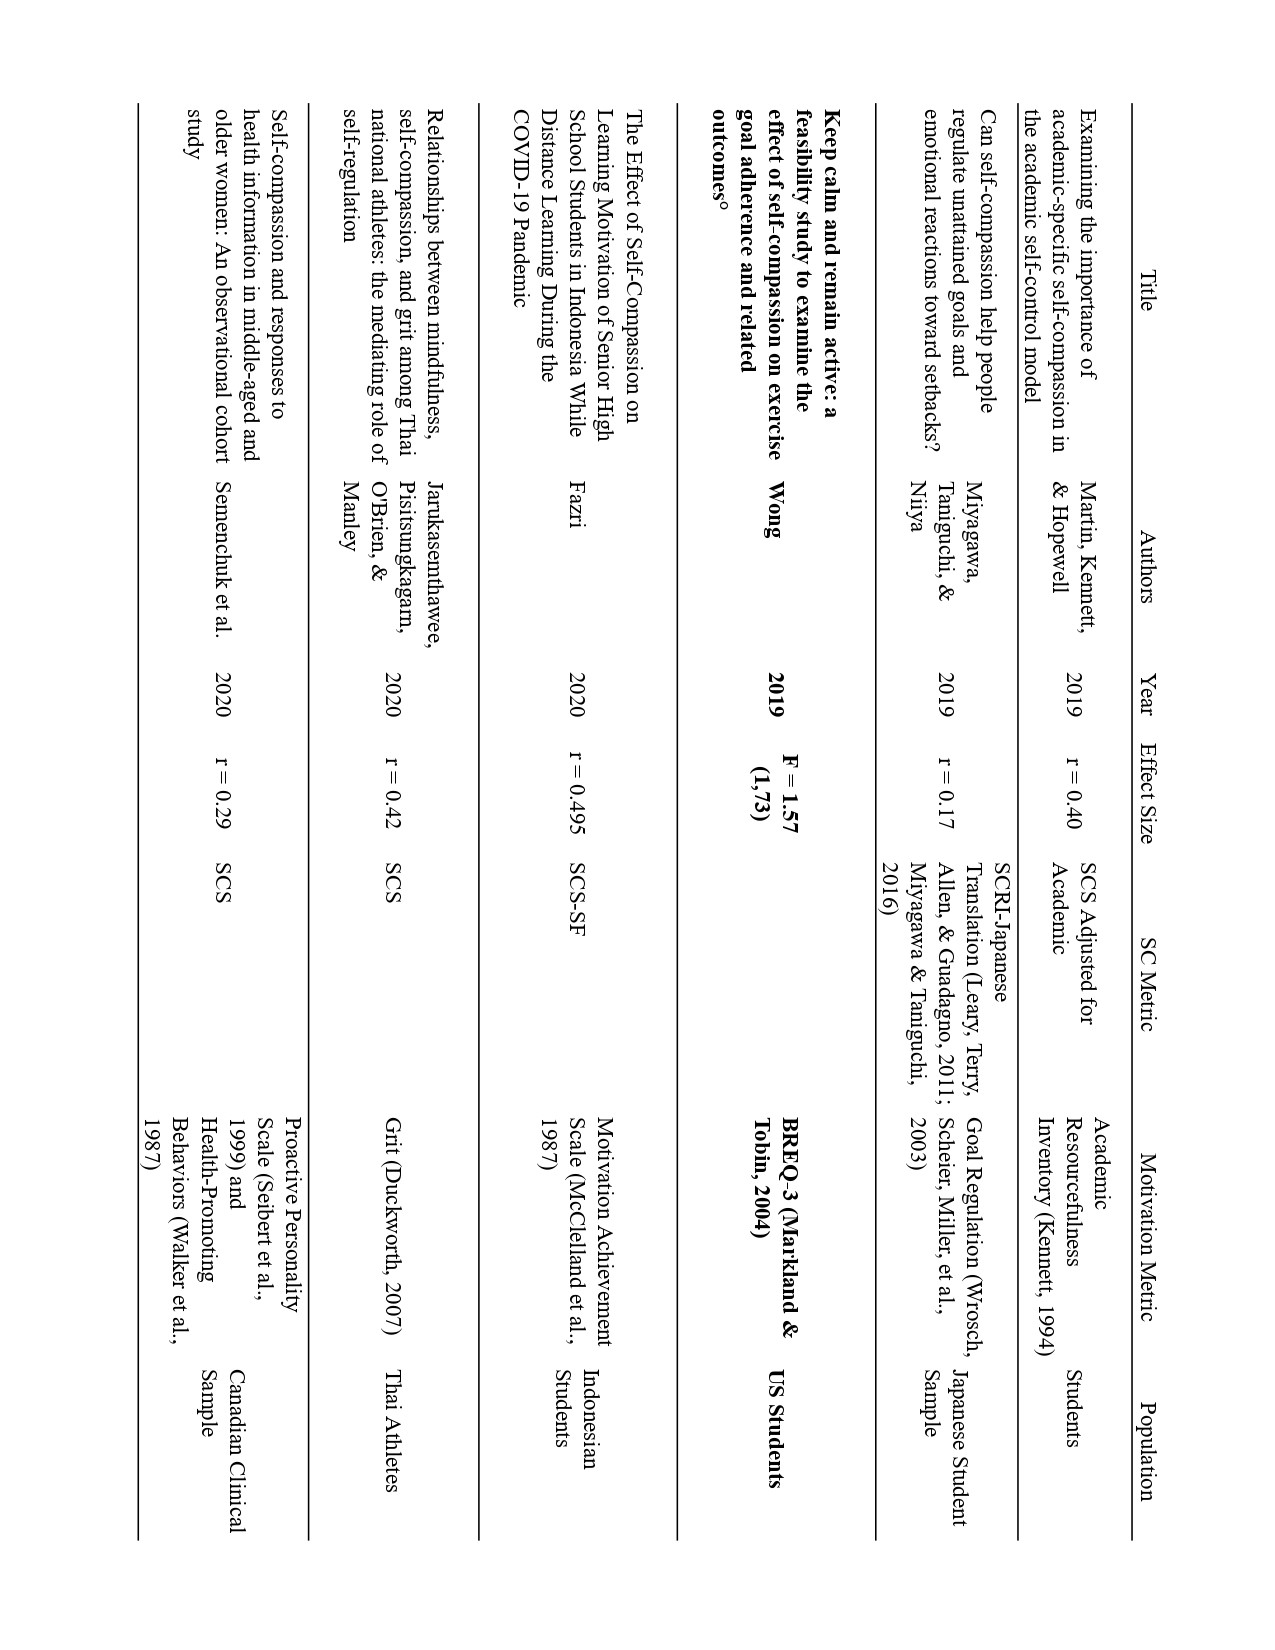
**

**
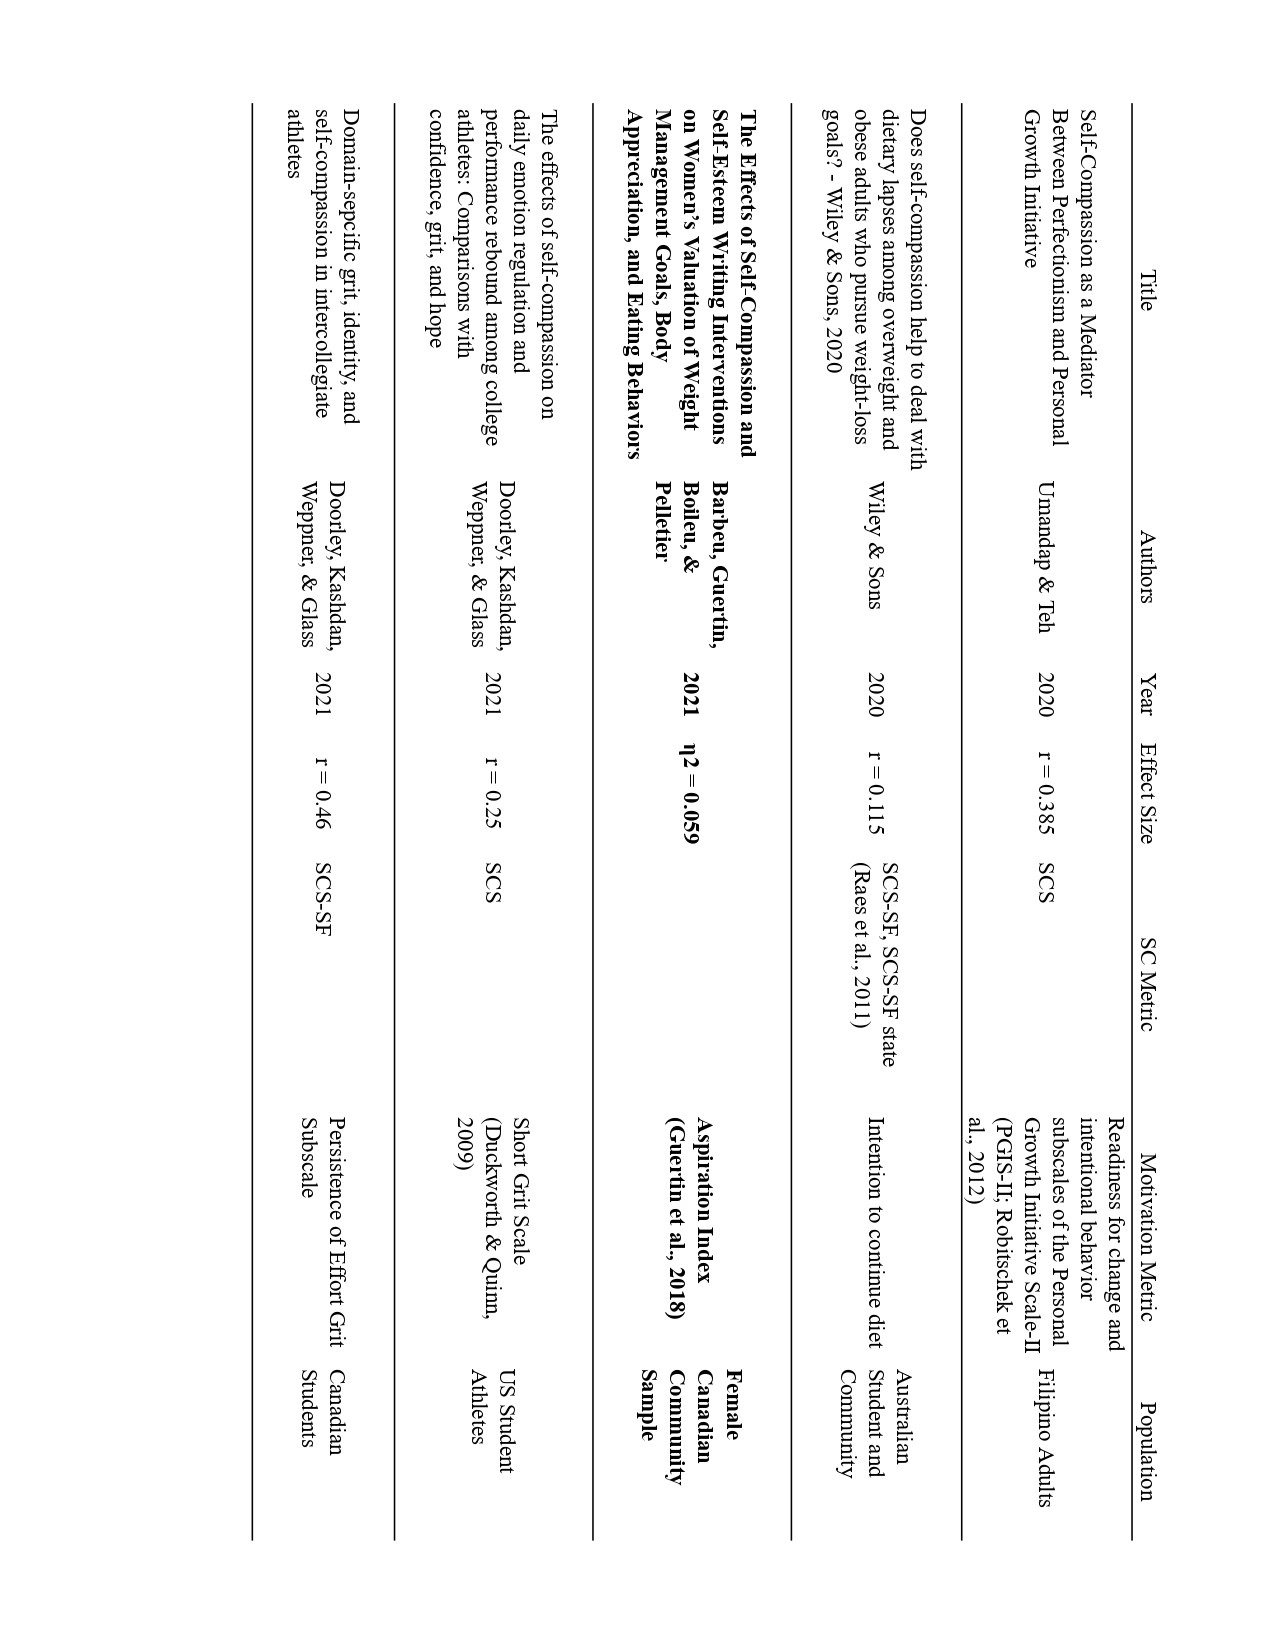
**

**
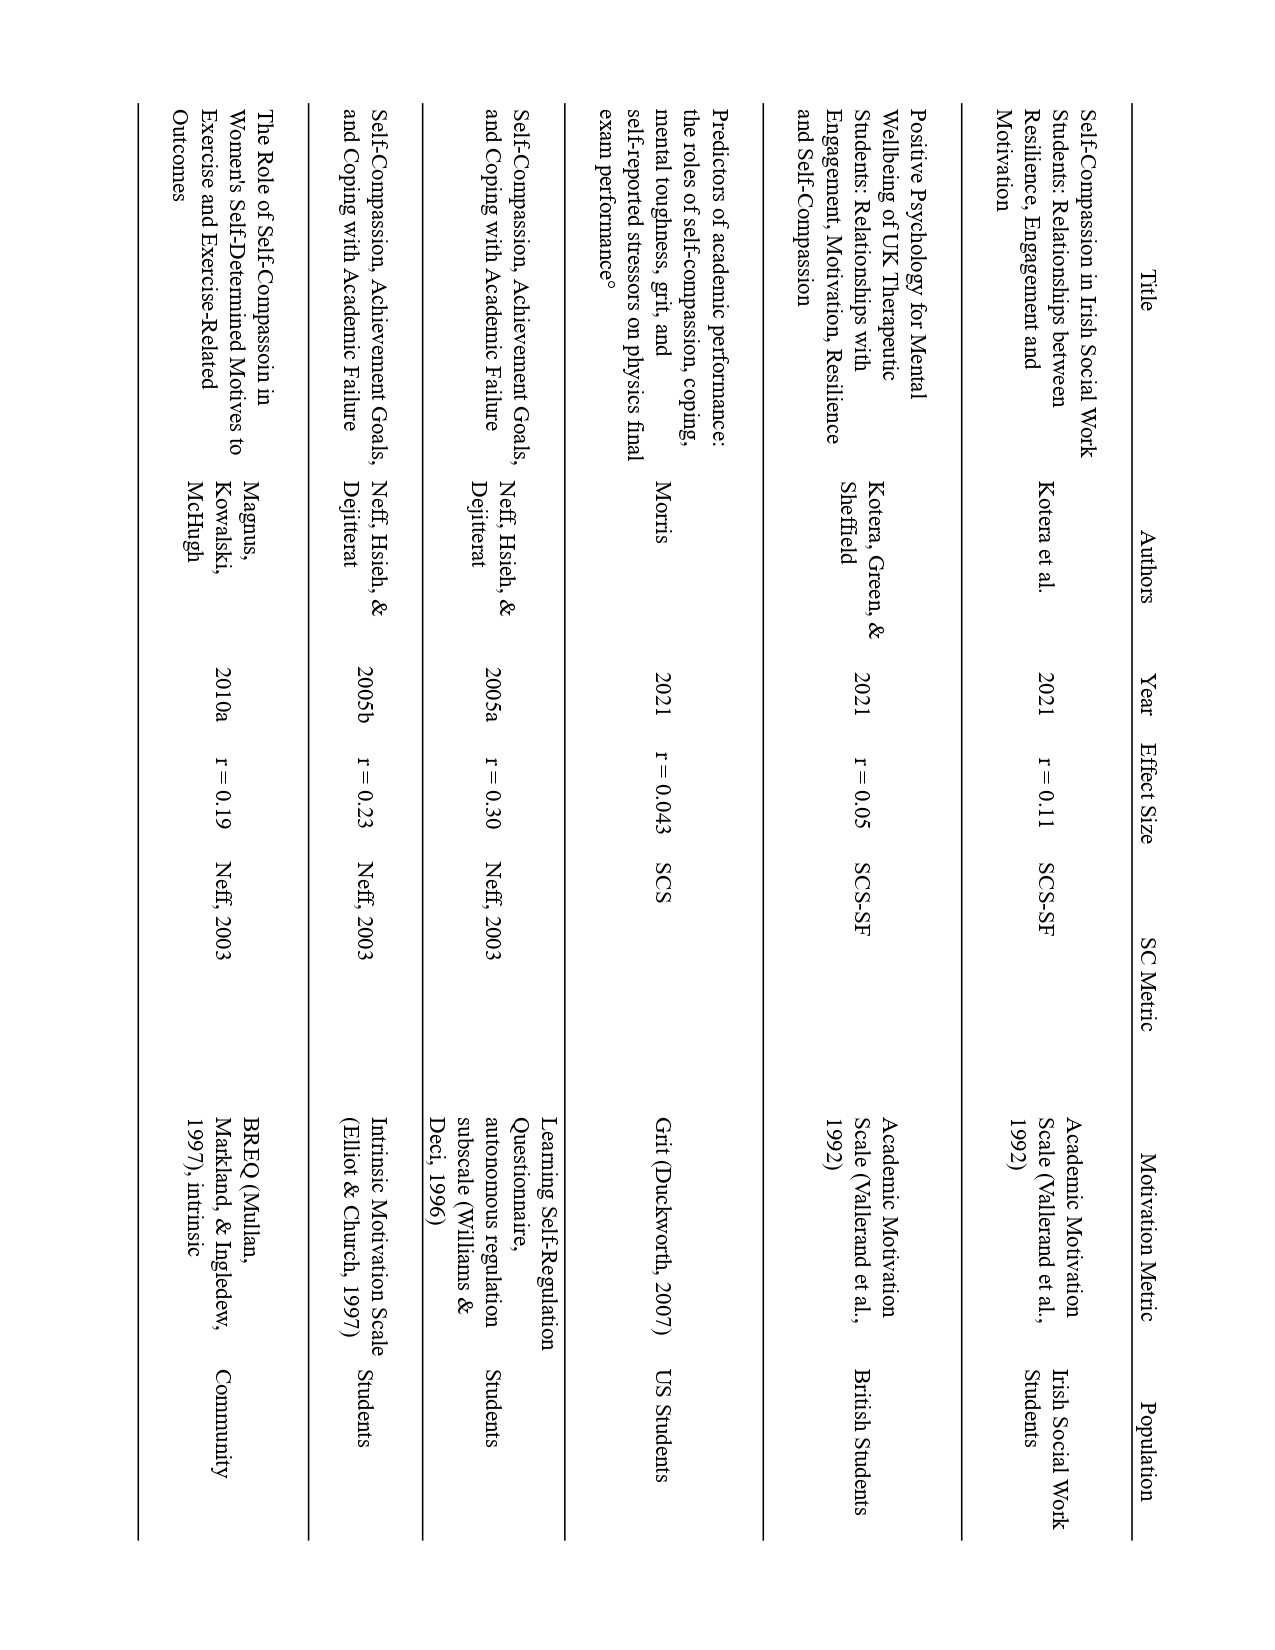
**

**
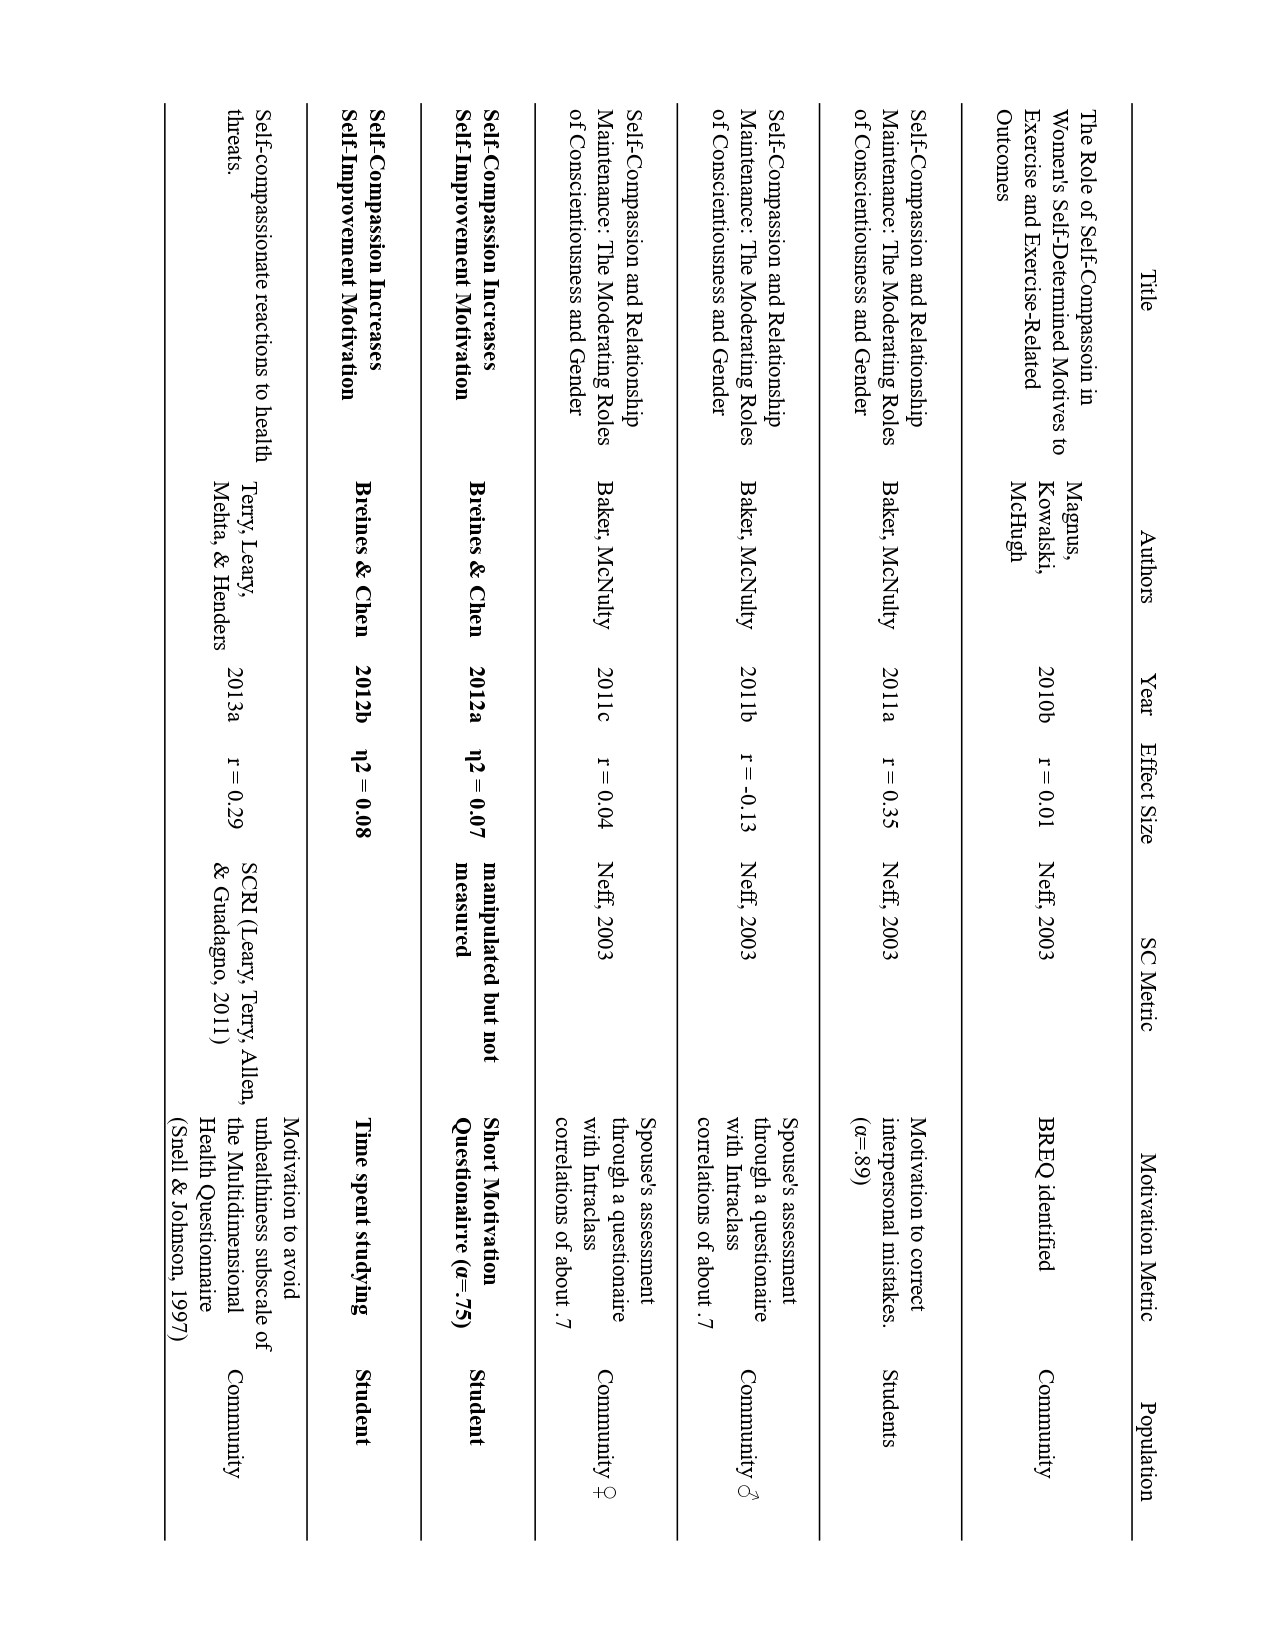
**

**
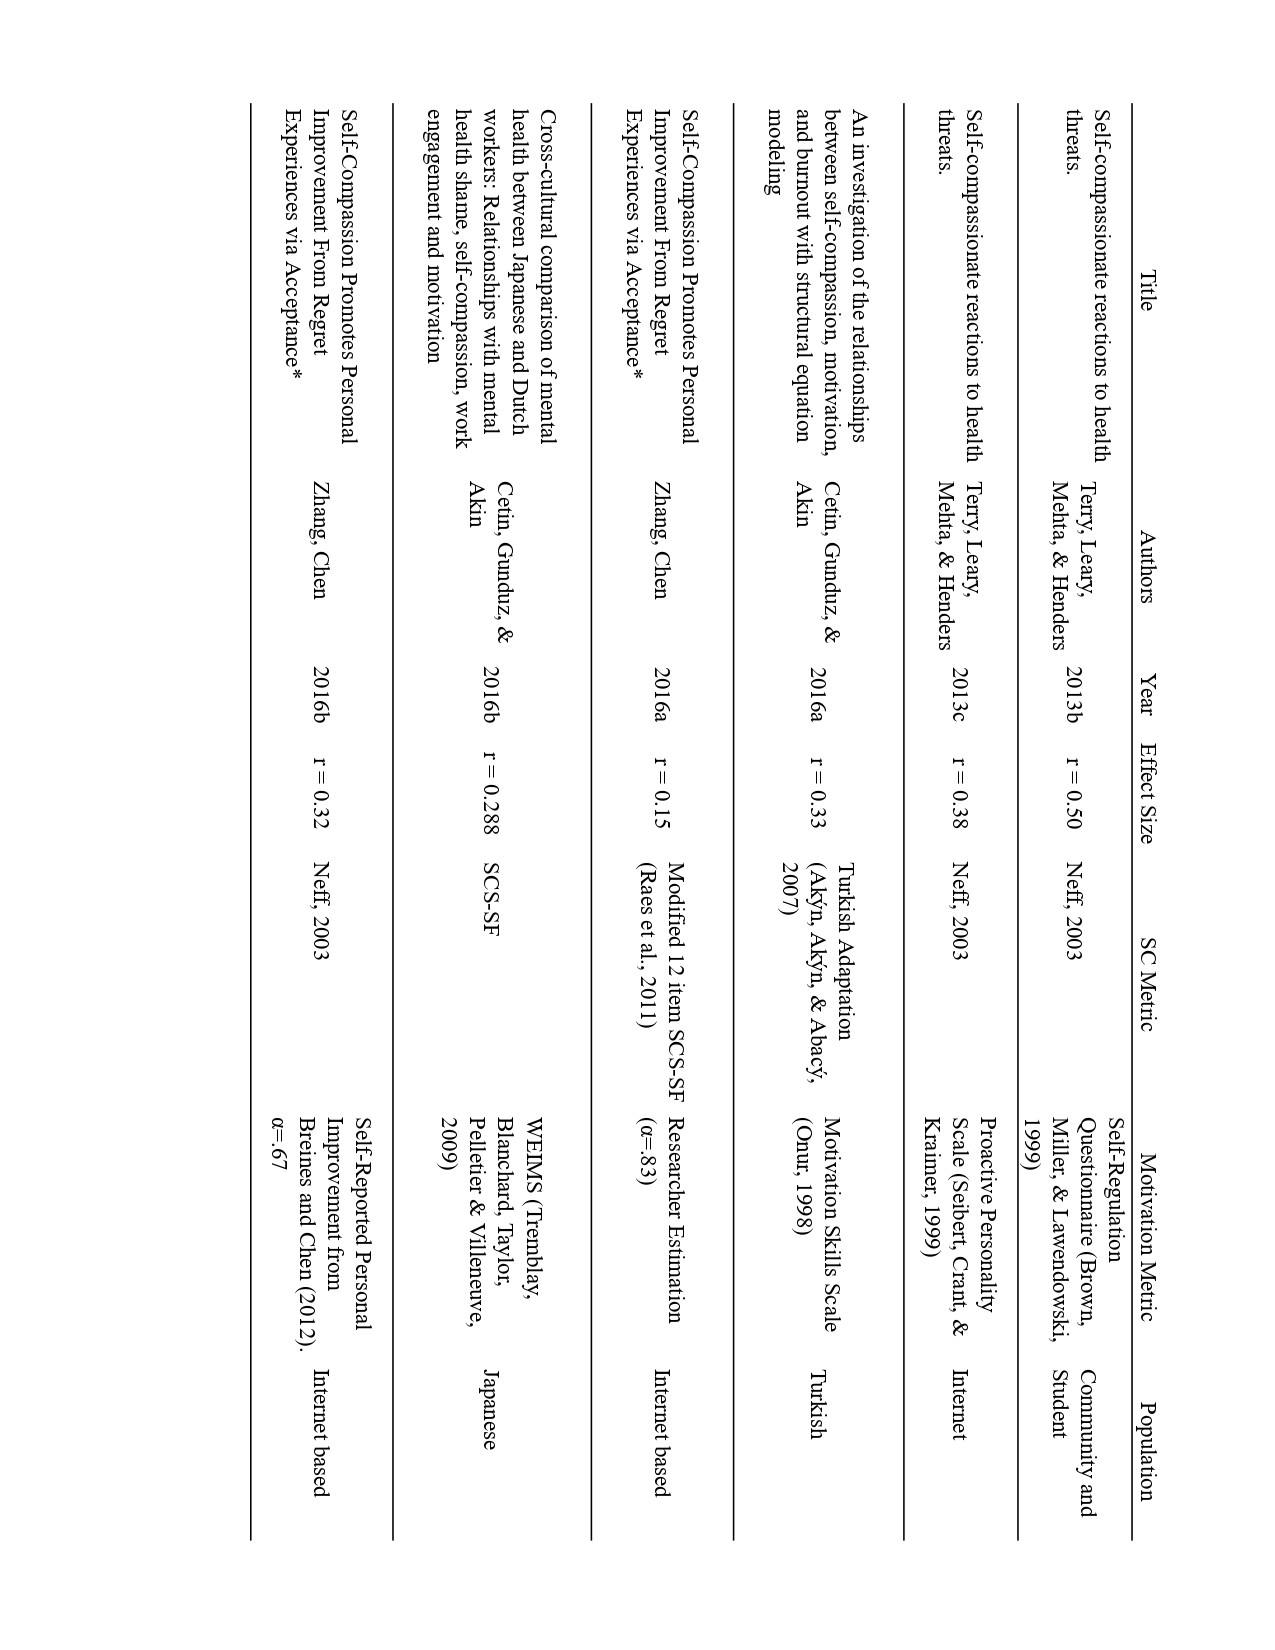
**

**
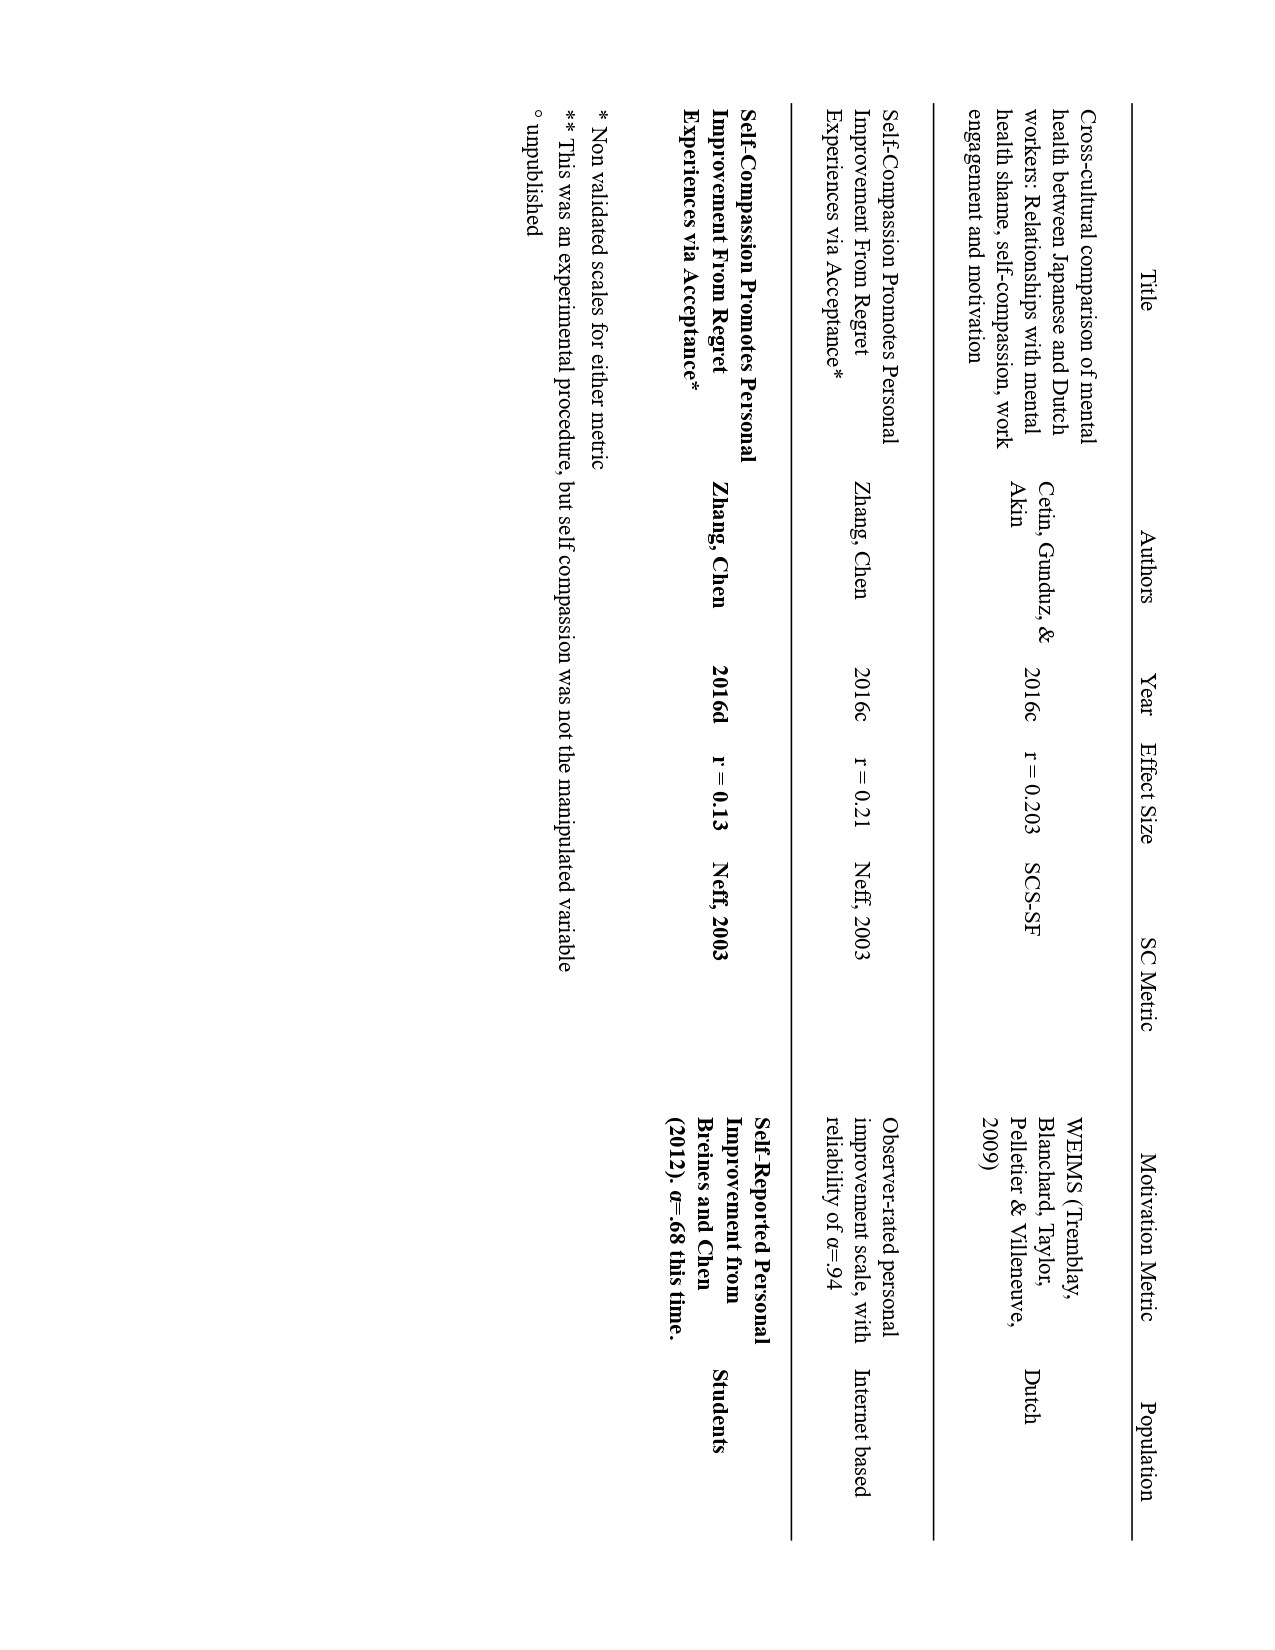
 Table 1** – summary of included studies and basic characteristics

Supplement: Supplementary file 1 [file f207c2730db33e725f34d700.docx]
